# Supplementary material for: Structure-guided AAV capsid evolution strategies for enhanced CNS gene delivery
Source: Springer Nature journal article supplement (doi:10.1038/s41596-023-00875-y), 2023-09-21
Supplement: MOESM3 [file 41596_2023_875_MOESM3_ESM26.xlsx]

## Sheet: Supp Table 1
Primer list
Purpose	Primer name	Step Number	Notes	Sequence
Plasmid generation	AAV98-null-F	22-23	pAAVx generation	aagtgagtagACCGGCTGGGTTCAAAACCAAG
	AAV98-null-R	22-23		aagatcagctaCTGGTGGTTTGTGGCCACTTGTCC
	AAV9_GFP_bsiwi_F	19	GFP filler in Cap	TTATCTCGTACGATGGTGAGCAAGGGCGAG
	AAV9_GFP_xbai_R	19		TTATCTTCTAGACTACTTGTACAGCTCGTCCATGC
	AAV2_Rep_SnaBi_F	21		TTATCTTACGTAATGCCGGGGTTTTACGAGATTGTG
	AAV9_Cap-GFP_SnaBi_R	21		TTATCTTACGTATCTAGACTACTTGTACAGCTCGTCCATG
	98L-F	26	PCR 1 library insert generation	TCCTATGGACAAGTGGCCACAAACCACCAGNNSNNSNNSNNSNNSNNSNNSACCGGCTGGGTTCAAAACC
	ColE1 origin R	26		GATTTTTGTGATGCTCGTCA
	94F	26	PCR 2 library insert generation	TCCAGGTCTTCACGGACTCAG
	98-1R	26		CTGGTGGTTTGTGGCCACTTG
	AAV9camseq	46	Sanger sequencing	CGTACCTTTCCATAGCAGCTACGC
Virus titration	ITR-F	65	AAV titration	AACATGCTACGCAGAGAGGGAGTGG
	ITR-R	65		CATGAGACAAGGAACCCCTAGTGATGGAG
Variant detection	AAV9 Lib amp F	74	AAV library ampflication	AGCACGGTCCAGGTCTTCAC
	AAV9 Lib amp R	74		ATGTCAGTCTAGACCAAAGTTCAACTGAAACGAATTAAACGG
	AAV4 Lib amp F	74		GGCAGCGACTCATCAACAAC
	AAV4 Lib amp R	74		CTTATCTACGTAGCCATGCTCTAGAGC
	9Lib-HTS-F	76	NGS	CCCTACACGACGCTCTTCCGATCTNNNNNGCTCACAGCCAAAGCCTGGACC
	9Lib-HTS-R	76		GACTGGAGTTCAGACGTGTGCTCTTCCGATCTNNNNNGTCCTTGCAGGTACACATCTCTGTCCTGC
	truseq1	79		CAAGCAGAAGACGGCATACGAGATCGTGATGTGACTGGAGTTCAGACG
	truseq2	79		CAAGCAGAAGACGGCATACGAGATACATCGGTGACTGGAGTTCAGACG
	truseq3	79		CAAGCAGAAGACGGCATACGAGATGCCTAAGTGACTGGAGTTCAGACG
	truseq4	79		CAAGCAGAAGACGGCATACGAGATTGGTCAGTGACTGGAGTTCAGACG
	truseq5	79		CAAGCAGAAGACGGCATACGAGATCACTGTGTGACTGGAGTTCAGACG
	truseq6	79		CAAGCAGAAGACGGCATACGAGATATTGGCGTGACTGGAGTTCAGACG
	truseq7	79		CAAGCAGAAGACGGCATACGAGATGATCTGGTGACTGGAGTTCAGACG
	truseq8	79		CAAGCAGAAGACGGCATACGAGATTCAAGTGTGACTGGAGTTCAGACG
	truseq9	79		CAAGCAGAAGACGGCATACGAGATCTGATCGTGACTGGAGTTCAGACG
	truseq10	79		CAAGCAGAAGACGGCATACGAGATAAGCTAGTGACTGGAGTTCAGACG
	truseq11	79		CAAGCAGAAGACGGCATACGAGATGTAGCCGTGACTGGAGTTCAGACG
	truseq12	79		CAAGCAGAAGACGGCATACGAGATTACAAGGTGACTGGAGTTCAGACG
	truseq13	79		CAAGCAGAAGACGGCATACGAGTGTTGACTGTGACTGGAGTTCAGACG
	truseq14	79		CAAGCAGAAGACGGCATACGAGACGGAACTGTGACTGGAGTTCAGACG
	truseq15	79		CAAGCAGAAGACGGCATACGAGTCTGACATGTGACTGGAGTTCAGACG
	truseq16	79		CAAGCAGAAGACGGCATACGAGCGGGACGGGTGACTGGAGTTCAGACG
	truseq18	79		CAAGCAGAAGACGGCATACGAGGTGCGGACGTGACTGGAGTTCAGACG
	truseq19	79		CAAGCAGAAGACGGCATACGAGCGTTTCACGTGACTGGAGTTCAGACG
	truseq20	79		CAAGCAGAAGACGGCATACGAGAAGGCCACGTGACTGGAGTTCAGACG
	truseq21	79		CAAGCAGAAGACGGCATACGAGTTCCGAAACGTGACTGGAGTTCAGACG
	truseq22	79		CAAGCAGAAGACGGCATACGAGTTACGTACGGTGACTGGAGTTCAGACG
	P5 Universal adaptor	79		AATGATACGGCGACCACCGAGATCTACACTCTTTCCCTACACGACGCTCTTCCG
Lead capsid generation	AAV.cc84 SDM-F	86-87	Quick change primers for variant generation	ggccctcagcACCGGCTGGGTTCAAAACCAAG
	AAV.cc84 SDM-R	86-87		cccaccgcgttCTGGTGGTTTGTGGCCACTTGTC
	AAV.cc81 SDM-F	86-87		cgtgccgtcgACCGGCTGGGTTCAAAACCAAG
	AAV.cc81 SDM-R	86-87		gacgagttcagCTGGTGGTTTGTGGCCACTTGTC
	AAV4.50 SDM-F	86-87		cttagaCCGACCGTGGACAGACTG
	AAV4.50 SDM-R	86-87		agccctGCTCTGGTCACCGCCAGG
	AAV4.51 SDM-F	86-87		gacagaCCGACCGTGGACAGACTG
	AAV4.51 SDM-R	86-87		caccctGCTCTGGTCACCGCCAGG
	AAV4.52 SDM-F	86-87		ttcaggCCGACCGTGGACAGACTG
	AAV4.52 SDM-R	86-87		gccggcGCTCTGGTCACCGCCAGG
	AAV4.67 SDM-F	86-87		agactgagcGCCTTGGGAGCCGTGCCT
	AAV4.67 SDM-R	86-87		gttcaccacCGGCAGGTTGCTGCTGCTC
	AAV4.68 SDM-F	86-87		ggcctgaggGCCTTGGGAGCCGTGCCT
	AAV4.68 SDM-R	86-87		tctcaccacCGGCAGGTTGCTGCTGCTC
	AAV4.69 SDM-F	86-87		gggctgggcGCCTTGGGAGCCGTGCCT
	AAV4.69 SDM-R	86-87		catcacgggCGGCAGGTTGCTGCTGCTC
Footnote: Uppercase letters represent the part of the primer that binds the template. Lower case letters represent the insert overhangs when performing site directed mutagenesis. The Blue color represents the leader sequence and the red color represents a restriction enzyme site, both of which are overhags to the primer sequence in black. N representes any nucleotide at that position and S repres…
